# Supplementary material for: Through an ecological lens: An ecosystem‐based approach to zoonotic risk assessment
Source: PubMed Central journal article supplement (PMC9900328; doi:10.15252/embr.202256578), 2023-01-18
Supplement: EMBR-24-e56578-s001.pdf [file EMBR-24-e56578-s001.pdf]

# Towards an ecosystems-based approach to zoonotic risk assessment

Mary Petrone, Erin Harvey, and Edward Holmes  
DOI: 10.15252/embr.202256578

*Corresponding author(s): Edward Holmes (edward.holmes@sydney.edu.au)*

---

## Review Timeline:

Submission Date:

29th Nov 22

Accepted:

5th Jan 23

---

*Editor: Holger Breithaupt*

## Transaction Report:

This article was editorially reviewed.
